# Supplementary material for: Changing iron content of the mouse brain during development
Source: Royal Society of Chemistry journal article supplement (doi:10.1039/c2mt20086d), 2012-01-01
Supplement: c2mt20086d.pdf [file c2mt20086d.pdf]

## Supporting Information for Holmes-Hampton *et al.* 2012

### Table of Contents:

- Figure S1. Corrected Mössbauer spectra of mice brains at different ages.
- Figure S2. Uncorrected Mössbauer spectra of mouse brains at different ages.
- Figure S3. Photograph of an iron-deficient mouse.
- Figure S4. EPR spectra of mouse brain homogenates from mice at different ages.
- Figure S5. UV-vis spectrum of Blood.
- Table S1. Masses of organs used for elemental analysis.
- Table S2. Iron concentrations of mouse organs used in the  $^{57}\text{Fe}$  enrichment study.
- Table S3. Percentage of total Fe that was  $^{57}\text{Fe}$  in mouse organs used in the  $^{57}\text{Fe}$  enrichment study.
- Table S4. Copper concentrations of mouse organs used in the enrichment study.
- Table S5. Manganese concentrations of mouse organs used in the enrichment study.
- Table S6. Zinc concentrations of mouse organs used in the enrichment study.
- Table S7. Molybdenum concentrations of mouse organs used in the enrichment study.
- Table S8. Phosphorus concentrations of mouse organs used in the enrichment study.
- Table S9. Elemental analysis of blood at indicated ages.

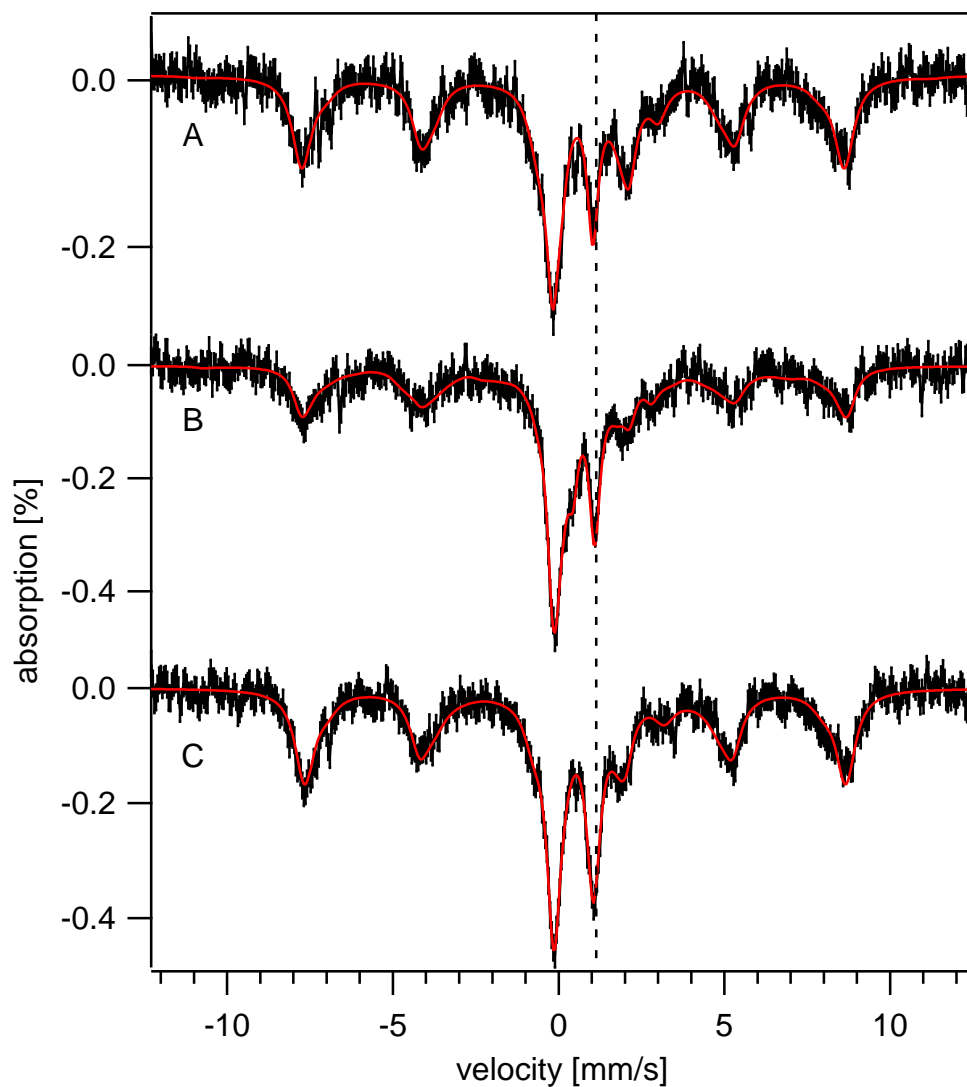

**Figure S1: Corrected Mössbauer spectra of mouse brains at A, 1 wk, B, 2 wks, and C, 24 wks.** The dashed line indicates the position of the high energy line of the central doublet. Simulations in red used parameters indicated in the text and percentages from Table 1. Spectra were collected at 6 K with a 0.05 T field applied parallel to the radiation.

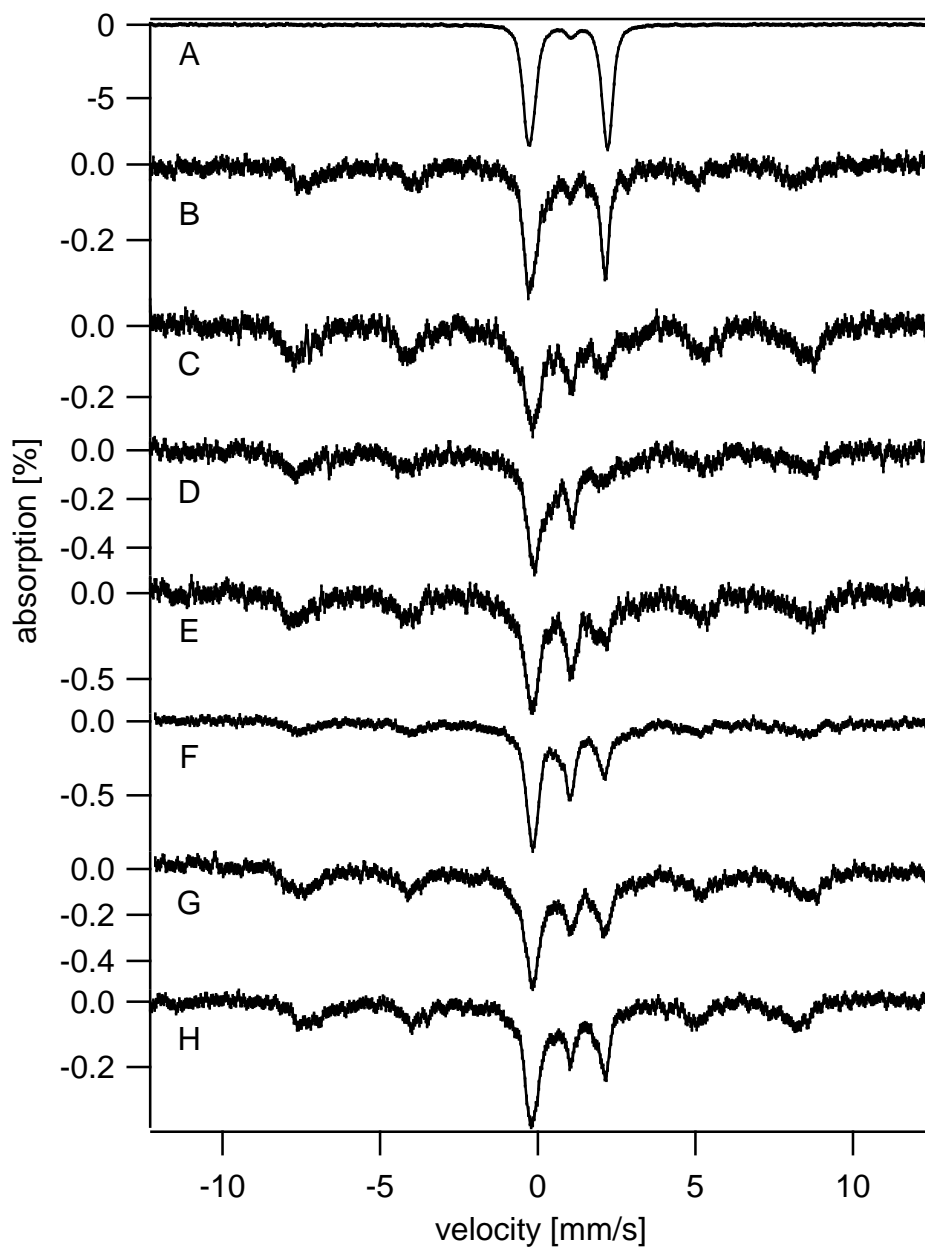

**Figure S2.** Uncorrected Mössbauer spectra of mouse brains at different ages. **A**, blood from a 4 wk mouse; **B**, unperfused prenatal brain (corresponds to corrected spectrum, Fig. 2E); **C**, uncorrected spectrum of perfused 1 wk brain (corrected spectrum is Fig. S1A); **D**, uncorrected spectrum of perfused 2 wk brain (corrected spectrum is Fig. S1B); **E**, uncorrected spectrum of perfused 3 wk brain (corrected spectrum is Fig. 2A); **F**, uncorrected spectrum of perfused 4 wk brain (corrected spectrum is Fig. 2F); **G**, uncorrected spectrum of perfused 24 wk

brain (corrected spectrum, Fig. **S1C**); **H**, uncorrected spectrum of perfused 58 wk brain (corrected spectrum, Fig. **2G**); Spectra were collected at 5-6 K and 0.05 T magnetic field applied parallel to the direction of the radiation. Total Mössbauer data collection times (in hrs), including 70 K data, were **A**, 40; **B**, 330; **C**, 435; **D**, 390; **E**, 240; **F**, 390; **G**, 570; and **H**, 400.

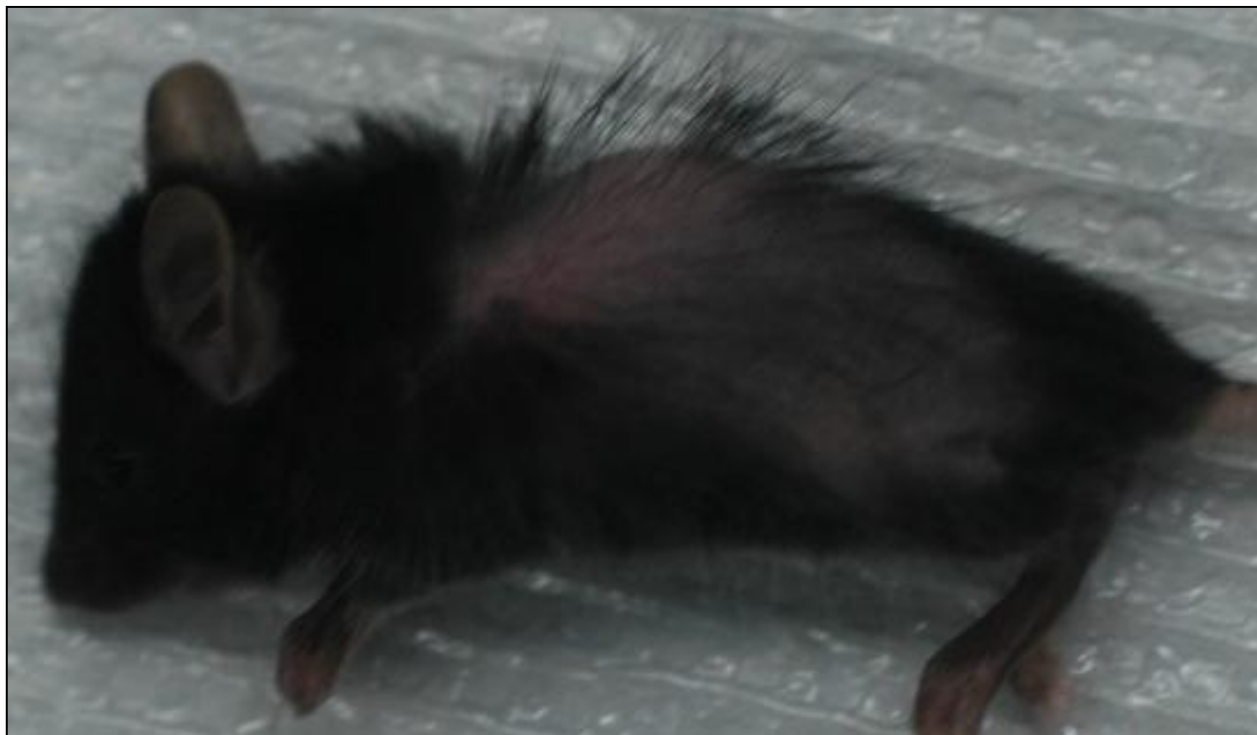

**Figure S3.** Photograph of an iron-deficient mouse used in this study. This 3 wk old mouse was nursed by a mother whose chow had been switched from  $^{57}\text{Fe}$ -supplemented to Fe-deficient *ca.* 3 days prior to giving birth. The pup displayed significant alopecia (thinning of hair) indicating Fe deficiency.

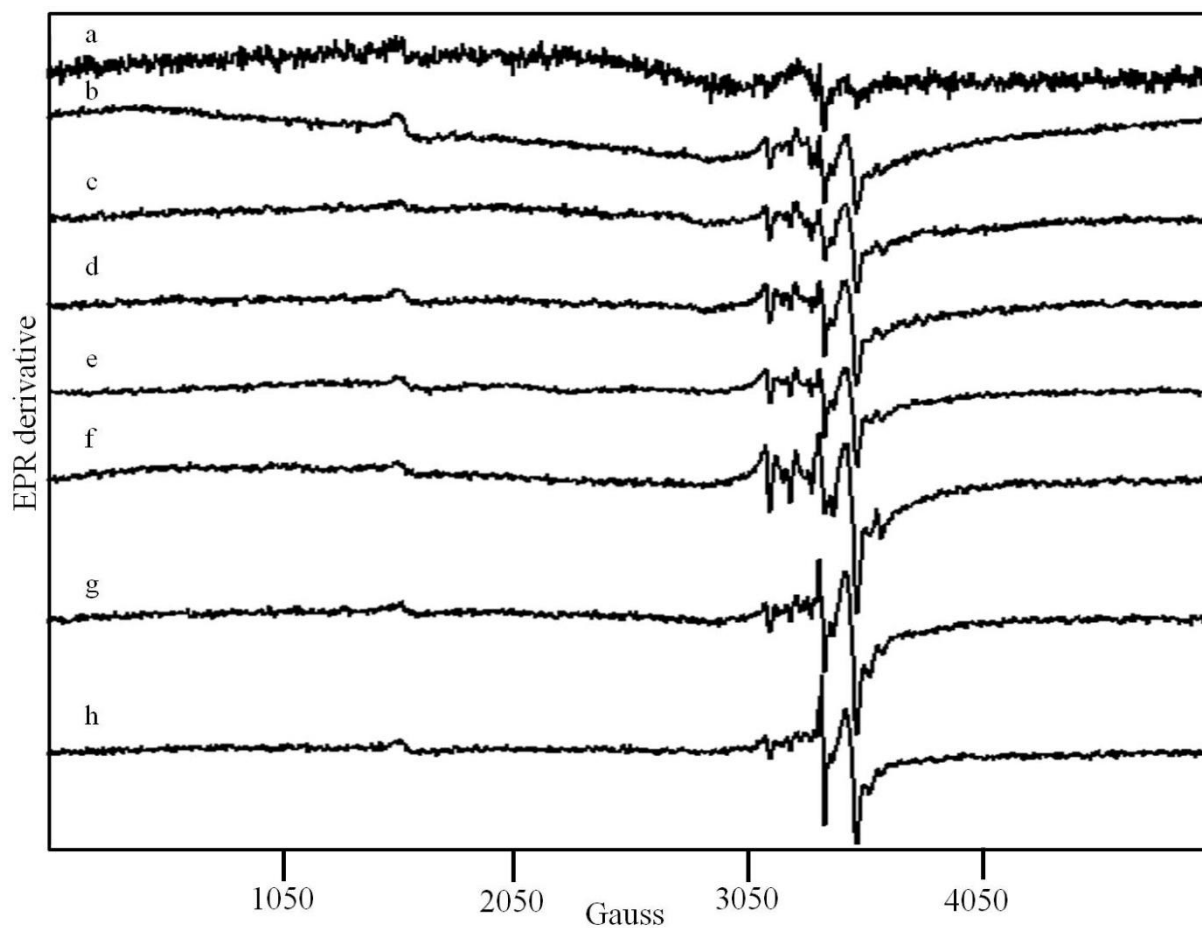

**Figure S4.** EPR spectra of packed mouse brain homogenates from mice euthanized at different ages. **a**, -1 wk; **b**, 1 wk; **c**, 2 wks; **d**, 3 wks; **e**, 3 wks, Fe-deficient; **f**, 4 wks; **g**, 24 wks; and **h**, 58 wks. EPR conditions are the same as in the Fig. 3 legend.

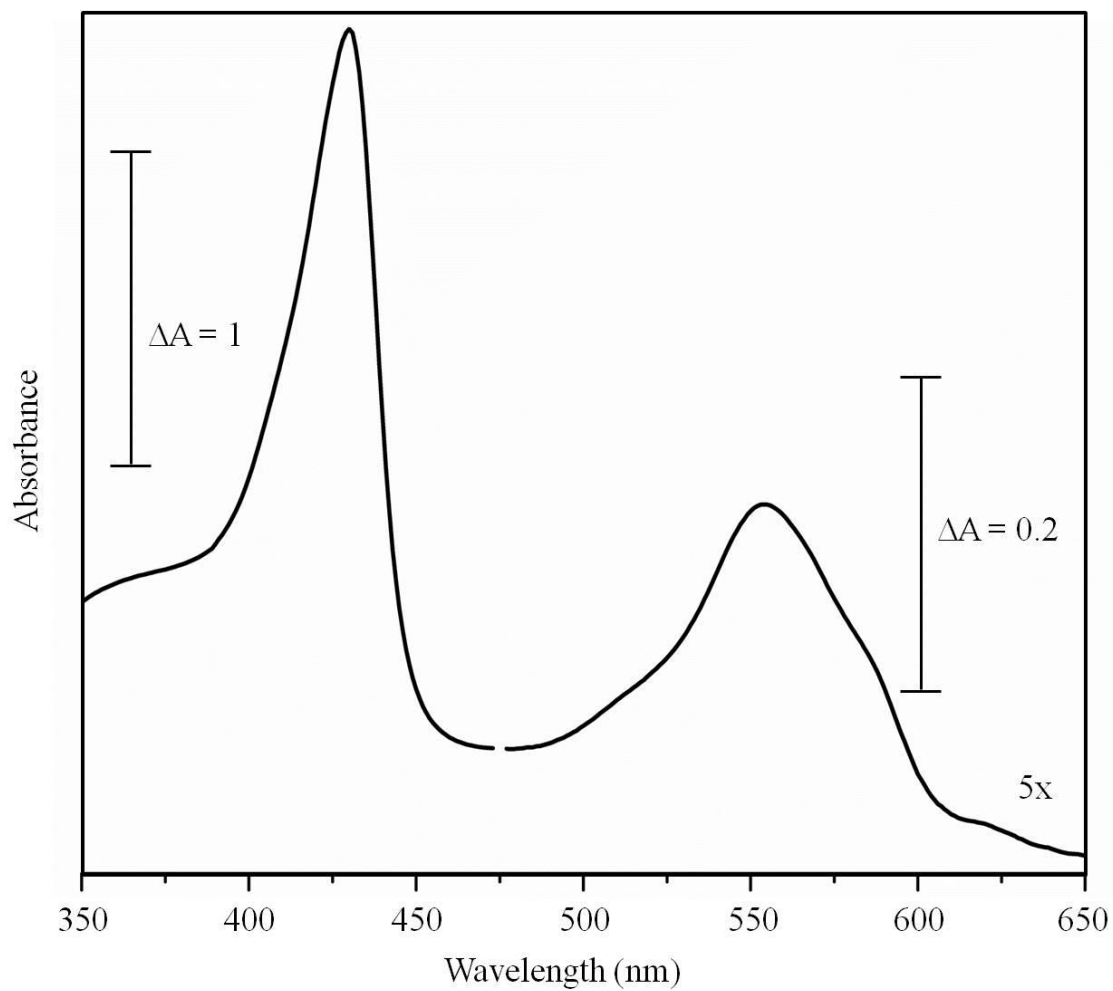

**Figure S5. UV-vis spectrum of Blood.** The sample (Sample 5, Table S9) was diluted 100:1 with Ringer's buffer plus heparin and was prepared under anaerobic conditions.

**Table S1. Masses of organs used for elemental analysis.** \*These numbers also apply to Tables S2 - S8.

| Age at Euthanization (wks) | Brain    | Liver      | Heart    | Kidney    | Spleen    | Duodenum | Number of animals* |
|----------------------------|----------|------------|----------|-----------|-----------|----------|--------------------|
| 4                          | 370 ± 2  | 890 ± 220  | 100 ± 10 | 160 ± 15  | 64 ± 26   | 82 ± 35  | 2                  |
| 5                          | 380 ± 27 | 740 ± 300  | 110 ± 12 | 270 ± 49  | 72 ± 21   | 110 ± 49 | 5                  |
| 6                          | 390 ± 17 | 1100 ± 77  | 120 ± 14 | 260 ± 21  | 71 ± 27   | 94 ± 44  | 5                  |
| 8                          | 400 ± 12 | 1100 ± 240 | 120 ± 17 | 300 ± 40  | 64 ± 11   | 120 ± 33 | 5                  |
| 12                         | 420 ± 1  | 900 ± 22   | 100 ± 7  | 280 ± 33  | 63 ± 5    | 110 ± 8  | 2                  |
| 16                         | 420 ± 26 | 1200 ± 320 | 140 ± 52 | 344 ± 210 | 410 ± 320 | 140 ± 37 | 2                  |
| 28                         | 400 ± 17 | 1700 ± 170 | 150 ± 27 | 340 ± 31  | 80 ± 10   | 140 ± 37 | 3                  |



**Table S2.** Iron concentrations of mouse organs ( $\mu\text{M}$ ) used in the  $^{57}\text{Fe}$  enrichment study, at different ages, along with standard deviations.

| Age at Euthanization (wks) | Brain        | Liver          | Heart          | Kidney         | Spleen          | Duodenum       |
|----------------------------|--------------|----------------|----------------|----------------|-----------------|----------------|
| 4                          | $410 \pm 12$ | $1700 \pm 370$ | $970 \pm 180$  | $1600 \pm 260$ | $3700 \pm 2400$ | $1100 \pm 220$ |
| 5                          | $350 \pm 60$ | $1600 \pm 250$ | $1400 \pm 290$ | $1900 \pm 460$ | $3200 \pm 1300$ | $890 \pm 210$  |
| 6                          | $380 \pm 76$ | $2400 \pm 480$ | $1400 \pm 210$ | $1800 \pm 570$ | $3100 \pm 800$  | $2000 \pm 890$ |
| 8                          | $300 \pm 48$ | $1800 \pm 340$ | $1600 \pm 230$ | $2200 \pm 340$ | $4300 \pm 1000$ | $990 \pm 240$  |
| 12                         | $290 \pm 48$ | $2200 \pm 64$  | $1300 \pm 180$ | $1500 \pm 680$ | $4300 \pm 1000$ | $870 \pm 84$   |
| 16                         | $330 \pm 44$ | $2300 \pm 18$  | $1400 \pm 18$  | $1400 \pm 440$ | $5100 \pm 1500$ | $910 \pm 33$   |
| 28                         | $410 \pm 30$ | $2200 \pm 310$ | $2000 \pm 320$ | $2700 \pm 450$ | $8700 \pm 2700$ | $1400 \pm 370$ |
| Average                    | $350 \pm 60$ | $2000 \pm 400$ | $1500 \pm 300$ | $2000 \pm 500$ | $4000 \pm 1400$ | $1200 \pm 600$ |

**Table S3.** Percentage of the total Fe that was  $^{57}\text{Fe}$  in mouse organs used in the  $^{57}\text{Fe}$  enrichment study. Numbers are reported as %, with standard deviations.

| Age at Euthanization (wks) | Brain       | Liver      | Heart         | Kidney      | Spleen      | Duodenum   |
|----------------------------|-------------|------------|---------------|-------------|-------------|------------|
| 4                          | $6.5 \pm 5$ | $3 \pm 0$  | $3.5 \pm 0.7$ | $3 \pm 0$   | $3 \pm 0$   | $3 \pm 0$  |
| 5                          | $9.4 \pm 2$ | $30 \pm 5$ | $17 \pm 3$    | $23 \pm 4$  | $25 \pm 5$  | $62 \pm 7$ |
| 6                          | $16 \pm 1$  | $43 \pm 3$ | $30 \pm 3$    | $36 \pm 4$  | $31 \pm 4$  | $74 \pm 5$ |
| 8                          | $21 \pm 3$  | $48 \pm 9$ | $38 \pm 5$    | $35 \pm 11$ | $31 \pm 4$  | $75 \pm 5$ |
| 12                         | $23 \pm 2$  | $48 \pm 1$ | $39 \pm 0$    | $48 \pm 2$  | $39 \pm 2$  | $79 \pm 2$ |
| 16                         | $30 \pm 7$  | $66 \pm 2$ | $47 \pm 6$    | $60 \pm 11$ | $54 \pm 16$ | $82 \pm 1$ |
| 28                         | $53 \pm 10$ | $53 \pm 3$ | $66 \pm 6$    | $78 \pm 7$  | $76 \pm 10$ | $88 \pm 5$ |

**Table S4.** Copper concentrations of mouse organs used in the enrichment study, at different ages. Concentrations and standard deviations are reported in  $\mu\text{M}$ .

| Age at Euthanization (wks) | Brain     | Liver      | Heart        | Kidney      | Spleen      | Duodenum    |
|----------------------------|-----------|------------|--------------|-------------|-------------|-------------|
| 4                          | $4 \pm 1$ | $6 \pm 2$  | $90 \pm 48$  | $64 \pm 8$  | $52 \pm 42$ | $36 \pm 10$ |
| 5                          | $5 \pm 2$ | $8 \pm 2$  | $130 \pm 83$ | $84 \pm 15$ | $18 \pm 7$  | $36 \pm 13$ |
| 6                          | $6 \pm 3$ | $12 \pm 3$ | $90 \pm 31$  | $86 \pm 26$ | $16 \pm 5$  | $39 \pm 8$  |
| 8                          | $4 \pm 1$ | $8 \pm 2$  | $100 \pm 19$ | $97 \pm 13$ | $20 \pm 5$  | $48 \pm 6$  |
| 12                         | $4 \pm 1$ | $9 \pm 0$  | $110 \pm 7$  | $86 \pm 7$  | $12 \pm 6$  | $41 \pm 7$  |
| 16                         | $4 \pm 1$ | $8 \pm 2$  | $100 \pm 6$  | $83 \pm 11$ | $15 \pm 8$  | $32 \pm 3$  |
| 28                         | $6 \pm 1$ | $7 \pm 1$  | $110 \pm 4$  | $87 \pm 2$  | $17 \pm 2$  | $34 \pm 3$  |
| Averages                   | $5 \pm 2$ | $8 \pm 3$  | $110 \pm 40$ | $90 \pm 20$ | $20 \pm 10$ | $40 \pm 10$ |

**Table S5.** Manganese concentrations of mouse organs used in the enrichment study, at different ages. Concentrations and standard deviations are reported in  $\mu\text{M}$ .

| Age at Euthanization (wks) | Brain      | Liver       | Heart       | Kidney      | Spleen    | Duodenum     |
|----------------------------|------------|-------------|-------------|-------------|-----------|--------------|
| 4                          | $21 \pm 8$ | $32 \pm 4$  | $8 \pm 2$   | $27 \pm 1$  | $6 \pm 1$ | $40 \pm 22$  |
| 5                          | $18 \pm 4$ | $48 \pm 17$ | $18 \pm 7$  | $53 \pm 19$ | $5 \pm 2$ | $42 \pm 17$  |
| 6                          | $17 \pm 2$ | $44 \pm 12$ | $18 \pm 8$  | $50 \pm 18$ | $5 \pm 2$ | $110 \pm 30$ |
| 8                          | $13 \pm 5$ | $27 \pm 10$ | $20 \pm 4$  | $54 \pm 16$ | $6 \pm 2$ | $66 \pm 29$  |
| 12                         | $11 \pm 1$ | $33 \pm 1$  | $26 \pm 6$  | $36 \pm 8$  | $4 \pm 2$ | $38 \pm 5$   |
| 16                         | $10 \pm 1$ | $24 \pm 4$  | $27 \pm 13$ | $37 \pm 1$  | $4 \pm 1$ | $70 \pm 30$  |
| 28                         | $10 \pm 1$ | $19 \pm 2$  | $14 \pm 1$  | $34 \pm 4$  | $6 \pm 1$ | $56 \pm 12$  |
| Averages                   | $14 \pm 5$ | $30 \pm 10$ | $18 \pm 7$  | $40 \pm 20$ | $5 \pm 2$ | $60 \pm 30$  |

**Table S6.** Zinc concentrations of mouse organs used in the enrichment study, at different ages.

Concentrations and standard deviations are reported in  $\mu\text{M}$ .

| Age at Euthanization (wks) | Brain        | Liver         | Heart         | Kidney        | Spleen        | Duodenum      |
|----------------------------|--------------|---------------|---------------|---------------|---------------|---------------|
| 4                          | $360 \pm 35$ | $380 \pm 28$  | $210 \pm 35$  | $320 \pm 29$  | $380 \pm 55$  | $310 \pm 97$  |
| 5                          | $330 \pm 94$ | $460 \pm 100$ | $330 \pm 87$  | $380 \pm 55$  | $370 \pm 140$ | $380 \pm 130$ |
| 6                          | $370 \pm 29$ | $640 \pm 160$ | $360 \pm 130$ | $470 \pm 110$ | $420 \pm 150$ | $710 \pm 110$ |
| 8                          | $300 \pm 86$ | $430 \pm 30$  | $330 \pm 100$ | $410 \pm 89$  | $460 \pm 83$  | $450 \pm 150$ |
| 12                         | $260 \pm 11$ | $470 \pm 7$   | $310 \pm 2$   | $340 \pm 8$   | $310 \pm 59$  | $250 \pm 78$  |
| 16                         | $260 \pm 2$  | $400 \pm 47$  | $290 \pm 3$   | $340 \pm 78$  | $280 \pm 100$ | $280 \pm 120$ |
| 28                         | $360 \pm 57$ | $460 \pm 24$  | $300 \pm 17$  | $380 \pm 16$  | $380 \pm 10$  | $440 \pm 45$  |
| Averages                   | $320 \pm 70$ | $470 \pm 110$ | $320 \pm 80$  | $390 \pm 80$  | $380 \pm 110$ | $430 \pm 170$ |

**Table S7.** Molybdenum concentrations of mouse organs used in the enrichment study, at different ages. Concentrations and standard deviations are reported in  $\mu\text{M}$ .

| Age at Euthanization (wks) | Brain         | Liver      | Heart         | Kidney    | Spleen        | Duodenum    |
|----------------------------|---------------|------------|---------------|-----------|---------------|-------------|
| 4                          | $0.1 \pm 0$   | $5 \pm 0$  | $0.6 \pm 0.1$ | $3 \pm 0$ | $0.7 \pm 0.1$ | $2 \pm 0$   |
| 5                          | $0.5 \pm 0.1$ | $10 \pm 3$ | $0.7 \pm 0.1$ | $5 \pm 1$ | $0.5 \pm 0.1$ | $3 \pm 1$   |
| 6                          | $0.5 \pm 0.1$ | $13 \pm 3$ | $0.7 \pm 0.3$ | $5 \pm 2$ | $0.6 \pm 0.2$ | $6 \pm 2$   |
| 8                          | $0.3 \pm 0.1$ | $9 \pm 1$  | $0.6 \pm 0.1$ | $6 \pm 0$ | $0.6 \pm 0.1$ | $3 \pm 1$   |
| 12                         | $0.3 \pm 0.1$ | $11 \pm 1$ | $0.6 \pm 0.1$ | $4 \pm 1$ | $0.5 \pm 0.1$ | $2.5 \pm 1$ |
| 16                         | $0.3 \pm 0.1$ | $9 \pm 1$  | $0.5 \pm 0.1$ | $4 \pm 0$ | $0.5 \pm 0.1$ | $2.5 \pm 1$ |
| 28                         | $0.4 \pm 0.1$ | $8 \pm 1$  | $0.5 \pm 0.1$ | $4 \pm 1$ | $0.6 \pm 0.1$ | $3 \pm 0$   |
| Averages                   | $0.4 \pm 0.1$ | $9 \pm 2$  | $0.6 \pm 0.2$ | $5 \pm 1$ | $0.6 \pm 0.1$ | $3 \pm 2$   |

**Table S8.** Phosphorus concentrations of mouse organs used in the enrichment study, at different ages. Concentrations and standard deviations are reported in mM.

| Age at Euthanization (wks) | Brain    | Liver    | Heart    | Kidney   | Spleen   | Duodenum |
|----------------------------|----------|----------|----------|----------|----------|----------|
| 4                          | 170 ± 36 | 110 ± 18 | 61 ± 8   | 110 ± 4  | 140 ± 7  | 84 ± 27  |
| 5                          | 170 ± 38 | 140 ± 32 | 110 ± 43 | 140 ± 37 | 150 ± 66 | 120 ± 61 |
| 6                          | 210 ± 12 | 180 ± 37 | 130 ± 26 | 180 ± 28 | 200 ± 30 | 240 ± 86 |
| 8                          | 160 ± 44 | 130 ± 26 | 110 ± 33 | 160 ± 34 | 190 ± 37 | 130 ± 33 |
| 12                         | 140 ± 16 | 150 ± 7  | 110 ± 18 | 150 ± 30 | 110 ± 42 | 83 ± 10  |
| 16                         | 140 ± 6  | 120 ± 11 | 140 ± 54 | 150 ± 33 | 140 ± 50 | 94 ± 28  |
| 28                         | 170 ± 33 | 130 ± 9  | 110 ± 7  | 160 ± 5  | 190 ± 11 | 160 ± 27 |
| Averages                   | 160 ± 40 | 130 ± 30 | 110 ± 30 | 150 ± 30 | 170 ± 50 | 140 ± 70 |

**Table S9.** Elemental analysis of blood at indicated ages.

| <b>BLOOD</b><br>(Age in wks) | [Fe] ( $\mu\text{M}$ ) | [Cu] ( $\mu\text{M}$ ) | [Mn] ( $\mu\text{M}$ ) | [Zn] ( $\mu\text{M}$ ) | [Mo] ( $\mu\text{M}$ ) | [P] (mM)     |
|------------------------------|------------------------|------------------------|------------------------|------------------------|------------------------|--------------|
| Sample 1 (4)                 | 7500                   | 6.8                    | 0.15                   | 71                     | 1.9                    | 320          |
| Sample 2 (5)                 | 7600                   | 7.1                    | 0.18                   | 70                     | 2.2                    | 320          |
| Sample 3 (5)                 | 7600                   | 6.5                    | 0.18                   | 69                     | 1.5                    | 320          |
| Sample 4 (18)                | 8400                   | 5.1                    | 0.22                   | 65                     | 2.0                    | 330          |
| Sample 5 (18)                | 8300                   | 5.3                    | 0.20                   | 54                     | 2.9                    | 370          |
| Sample 6 (18)                | 7500                   | 5.4                    | 0.19                   | 61                     | 2.4                    | 370          |
| Averages                     | $7800 \pm 400$         | $6 \pm 1$              | $0.19 \pm 0.02$        | $65 \pm 7$             | $2.1 \pm 0.5$          | $340 \pm 20$ |
